# Supplementary material for: MOdified NARanjo Causality Scale for ICSRs (MONARCSi): A Decision Support Tool for Safety Scientists
Source: PubMed Central journal article supplement — Drug Saf. 2018 Jun 6;41(11):1073–85. doi: 10.1007/s40264-018-0690-y (PMC6182464; doi:10.1007/s40264-018-0690-y), 2018-06-06

The MODified NARranjo Causality Scale for ICSRs (MONARCSi): A Decision Support Tool for Safety Scientists

Journal: Drug Safety

Authors: Shaun Comfort MD, MBA; Darren Dorrell; Shawman Meireis MBA; Jennifer Fine PhD

Corresponding author: Shaun Comfort MD, MBA

Genentech, Inc – a Member of the Roche Group, South San Francisco, California.

Email: comforts@gene.com

**Online Resource 10** Aggregate feature weighting for each MONARCSi Feature across therapeutic area and geography for the presence (confirmatory evidence) and absence (disconfirmatory evidence)

1. MONARCSi Feature 1: Significant Safety Event

a. MONARCSi Feature 1: Significant Safety Event – confirmatory

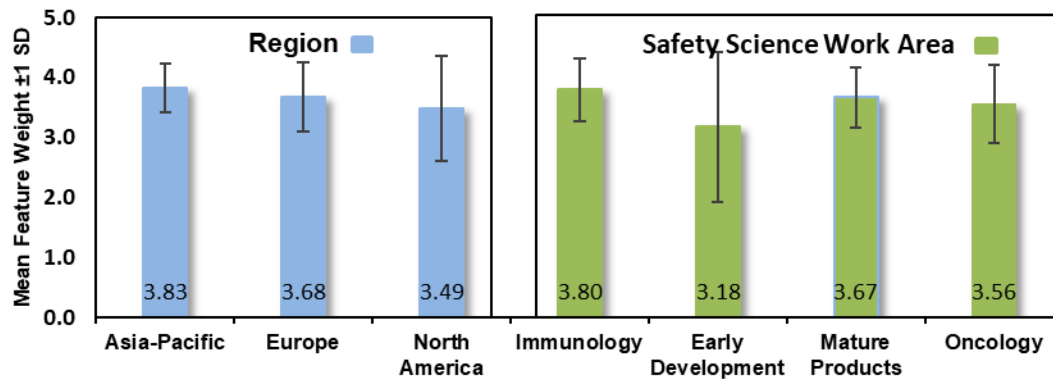

b. MONARCSi Feature 1: Significant Safety Event - disconfirmatory

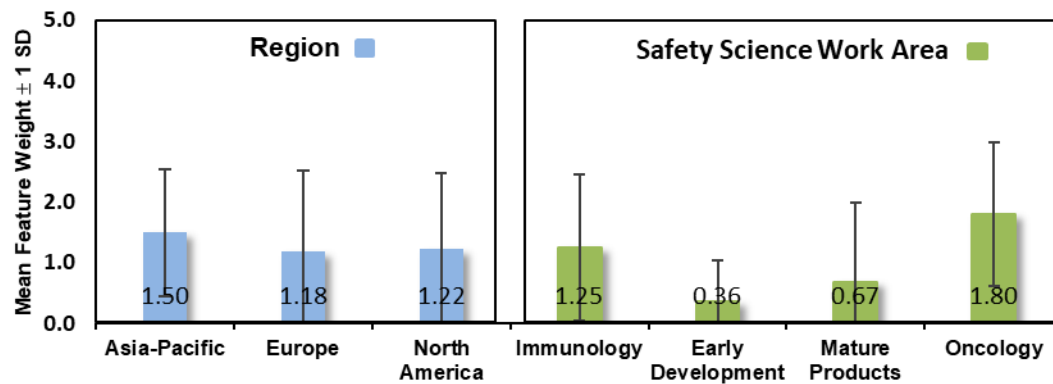

2. MONARCSi Feature 2: Previous Association

a. MONARCSi Feature 2: Previous Association – confirmatory

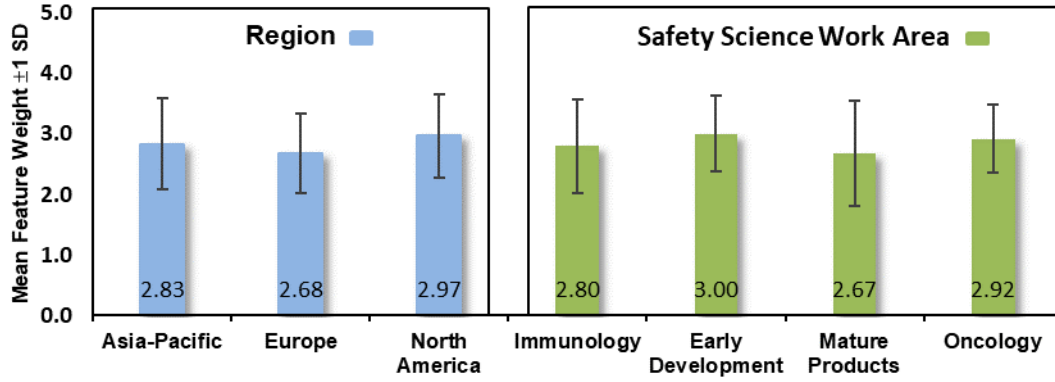

b. MONARCSi Feature 2: Previous Association – disconfirmatory

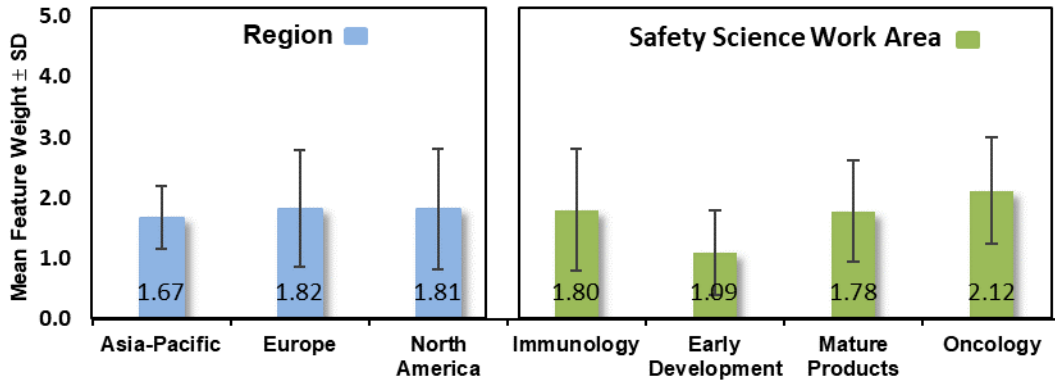

3. MONARCSi Feature 3: Temporality

a. MONARCSi Feature 3: Temporality – confirmatory

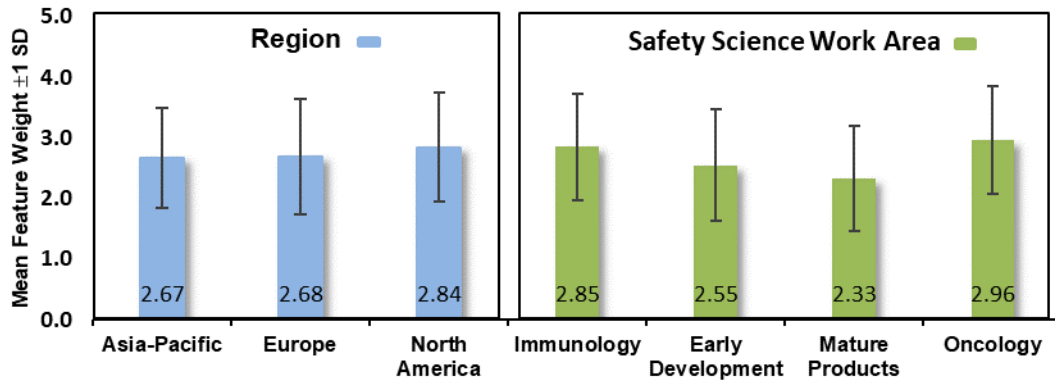

b. MONARCSi Feature 3: Temporality – disconfirmatory

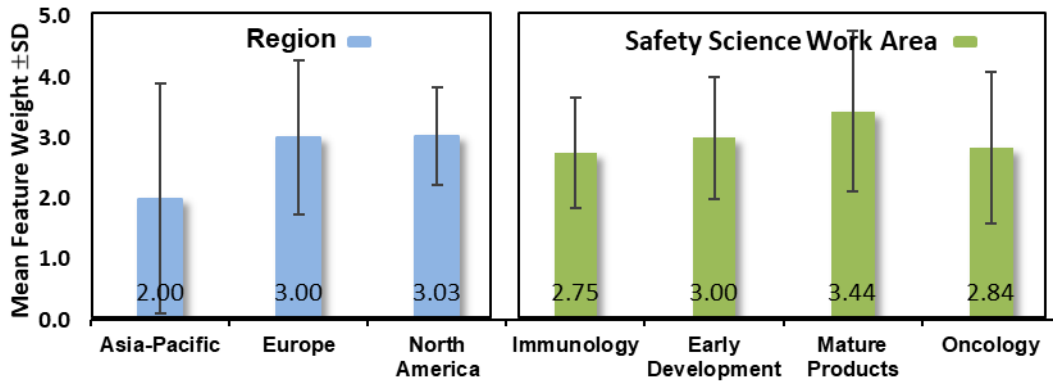

4. MONARCSi Feature 4: Mechanism of Action

a. MONARCSi Feature 4: Mechanism of Action – confirmatory

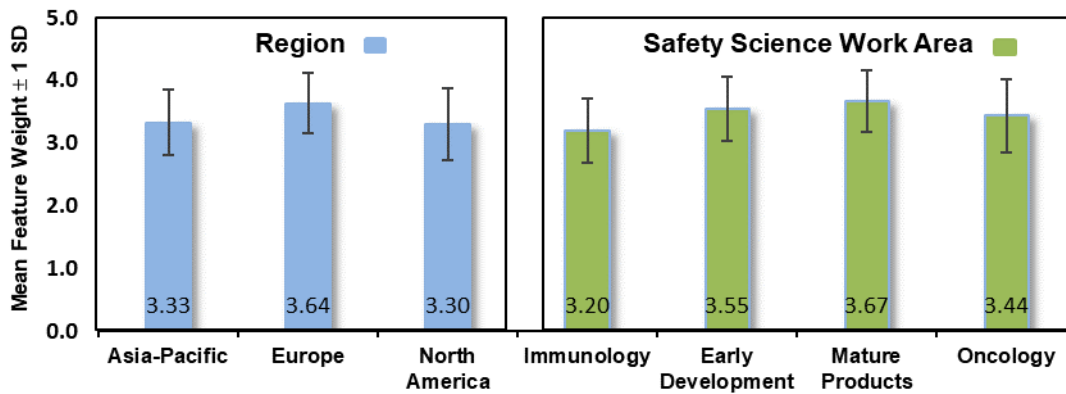

b. MONARCSi Feature 4: Mechanism of Action – disconfirmatory

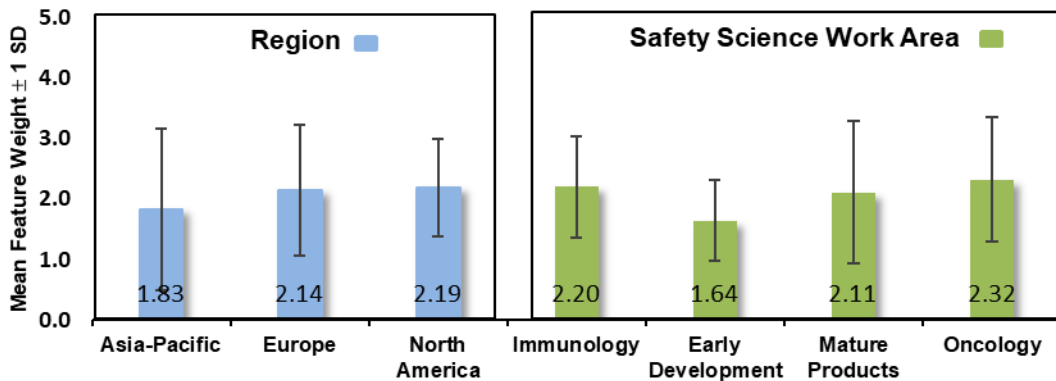

5. MONARCSi Feature 5: De-Challenge

a. MONARCSi Feature 5: De-Challenge – confirmatory

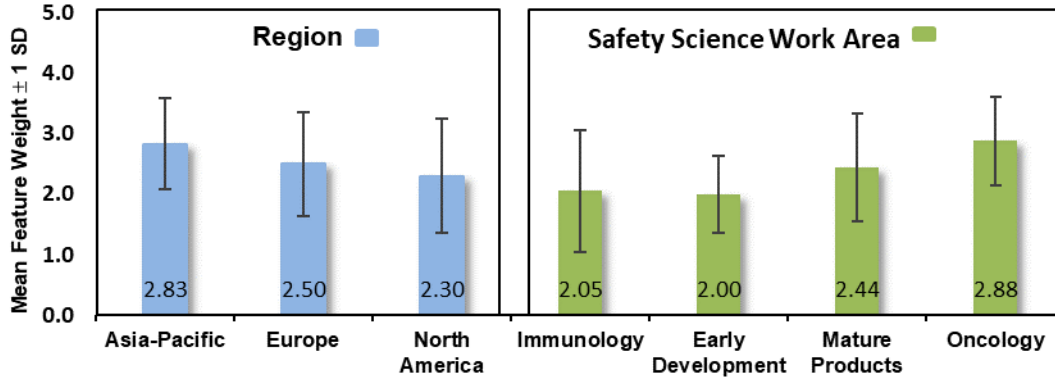

b. MONARCSi Feature 5: De-challenge – disconfirmatory

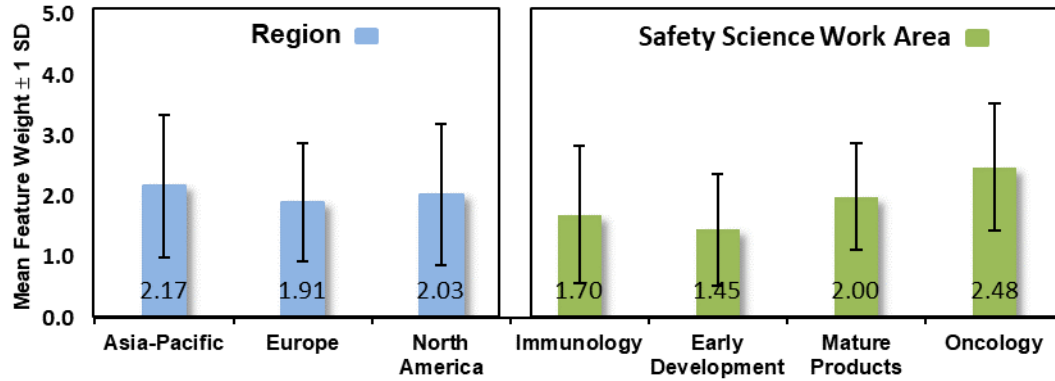

6. MONARCSi Feature 6: Re-Challenge

a. MONARCSi Feature 6: Re-Challenge – confirmatory

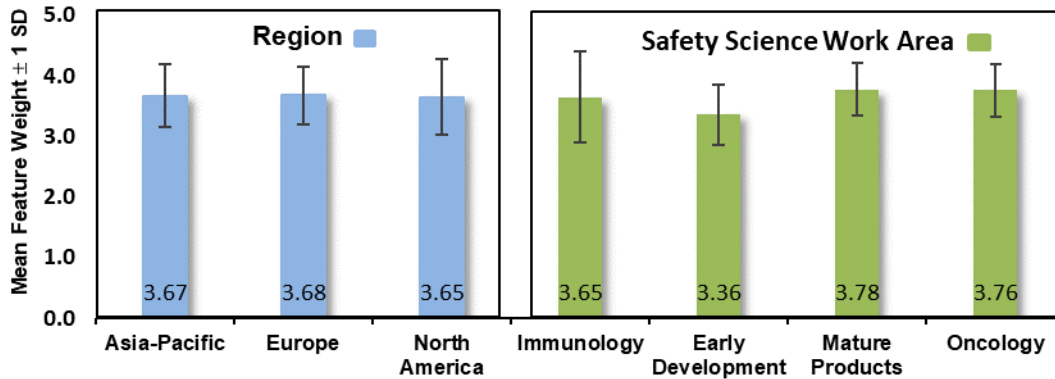

b. MONARCSi Feature 6: Re-Challenge – disconfirmatory

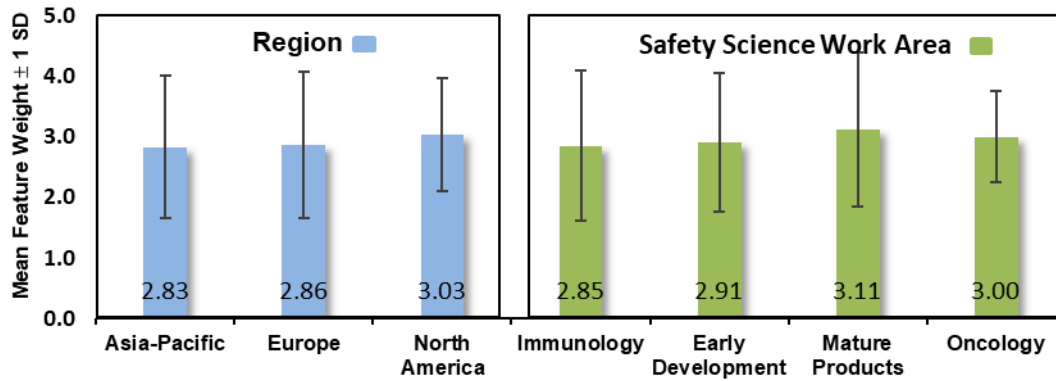

7. MONARCSi Feature 7: Dose Response

a. MONARCSi Feature 7: Dose Response – confirmatory

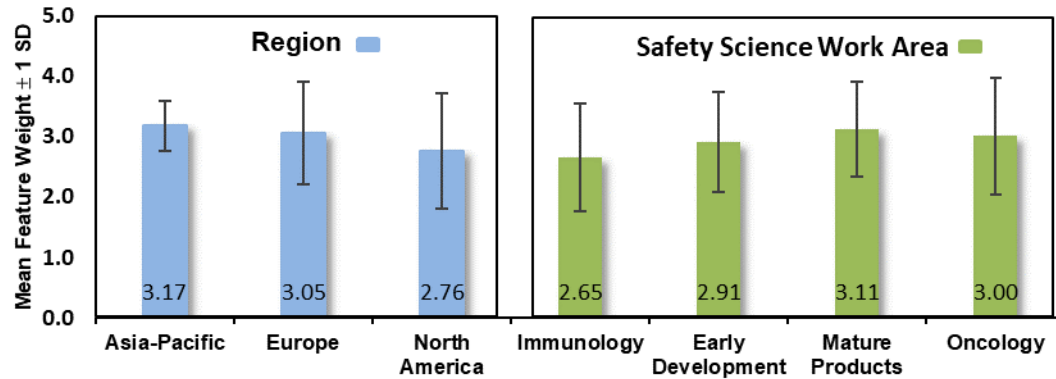

b. MONARCSi Feature 7: Dose Response – disconfirmatory

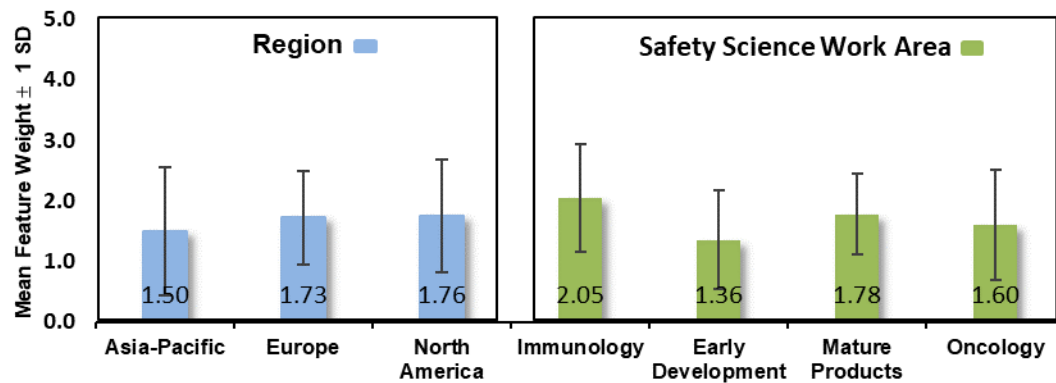

8. MONARCSi Feature 8: Experimental Data

a. MONARCSi Feature 8: Experimental Data – confirmatory

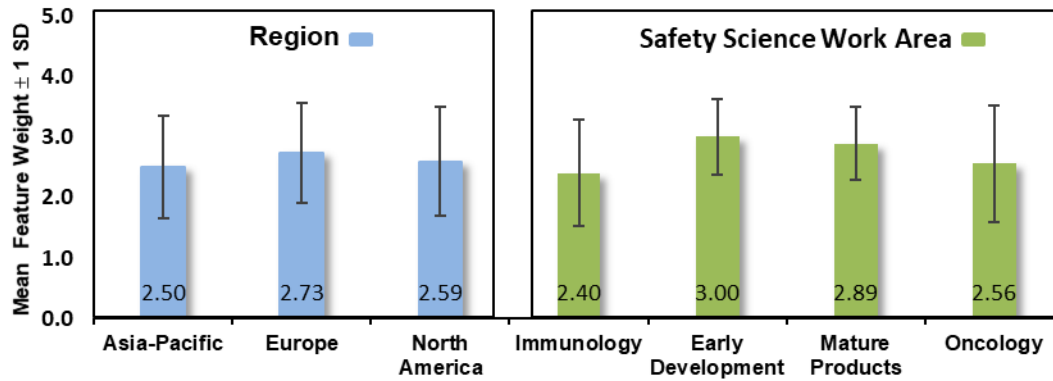

b. MONARCSi Feature 8: Experimental Data – disconfirmatory

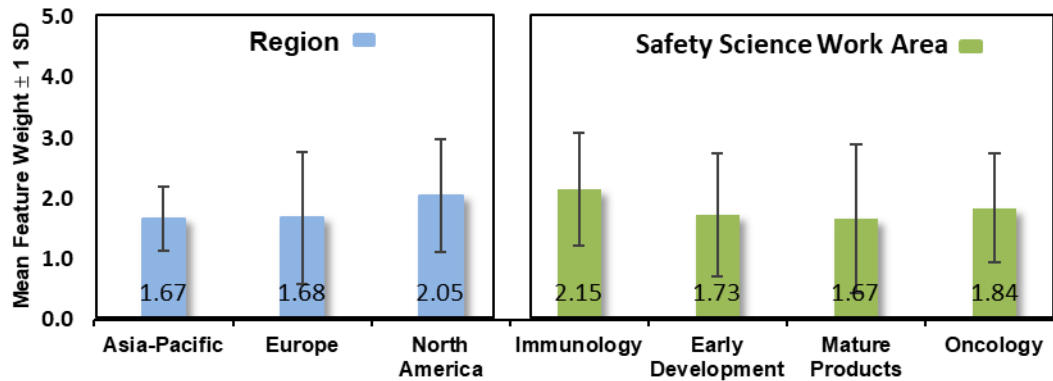

9. MONARCSi Feature 9: Confounding Factors

a. MONARCSi Feature 9: Confounding Factors – confirmatory

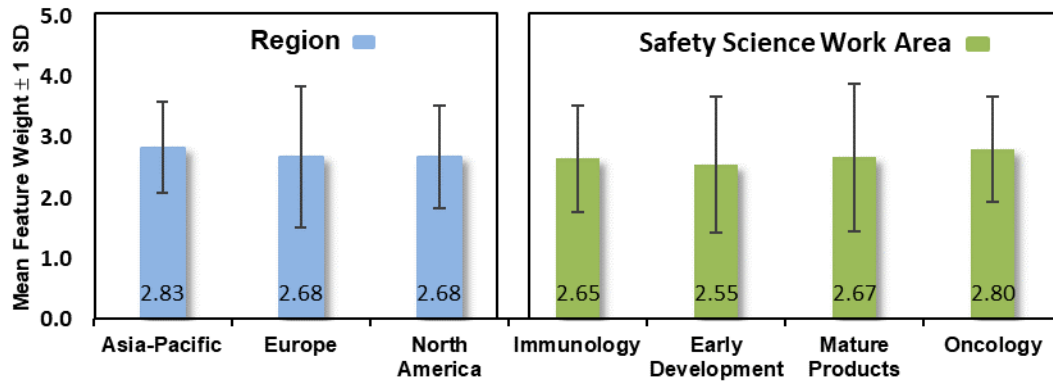

b. MONARCSi Feature 9: Confounding Factors – disconfirmatory

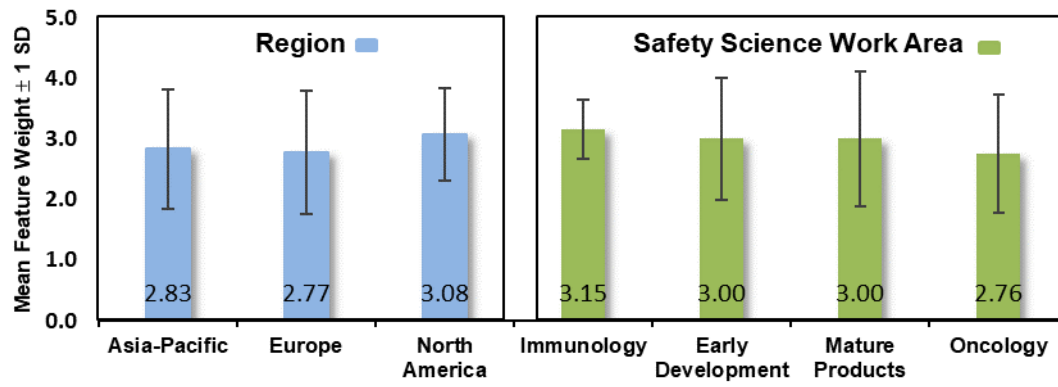

Supplement: 40264_2018_690_MOESM3_ESM.pdf [file 40264_2018_690_MOESM3_ESM.pdf]
