# Supplementary material for: MOdified NARanjo Causality Scale for ICSRs (MONARCSi): A Decision Support Tool for Safety Scientists
Source: PubMed Central journal article supplement — Drug Saf. 2018 Jun 6;41(11):1073–85. doi: 10.1007/s40264-018-0690-y (PMC6182464; doi:10.1007/s40264-018-0690-y), 2018-06-06

# The MOmodified NARranjo Causality Scale for ICSRs (MONARCSi): A Decision Support Tool for Safety Scientists

Journal: Drug Safety

Authors: Shaun Comfort MD, MBA; Darren Dorrell; Shawman Meireis MBA; Jennifer Fine PhD

Corresponding author: Shaun Comfort MD, MBA

Genentech, Inc – a Member of the Roche Group, South San Francisco, California.

Email: comforts@gene.com

## Online Resource 1

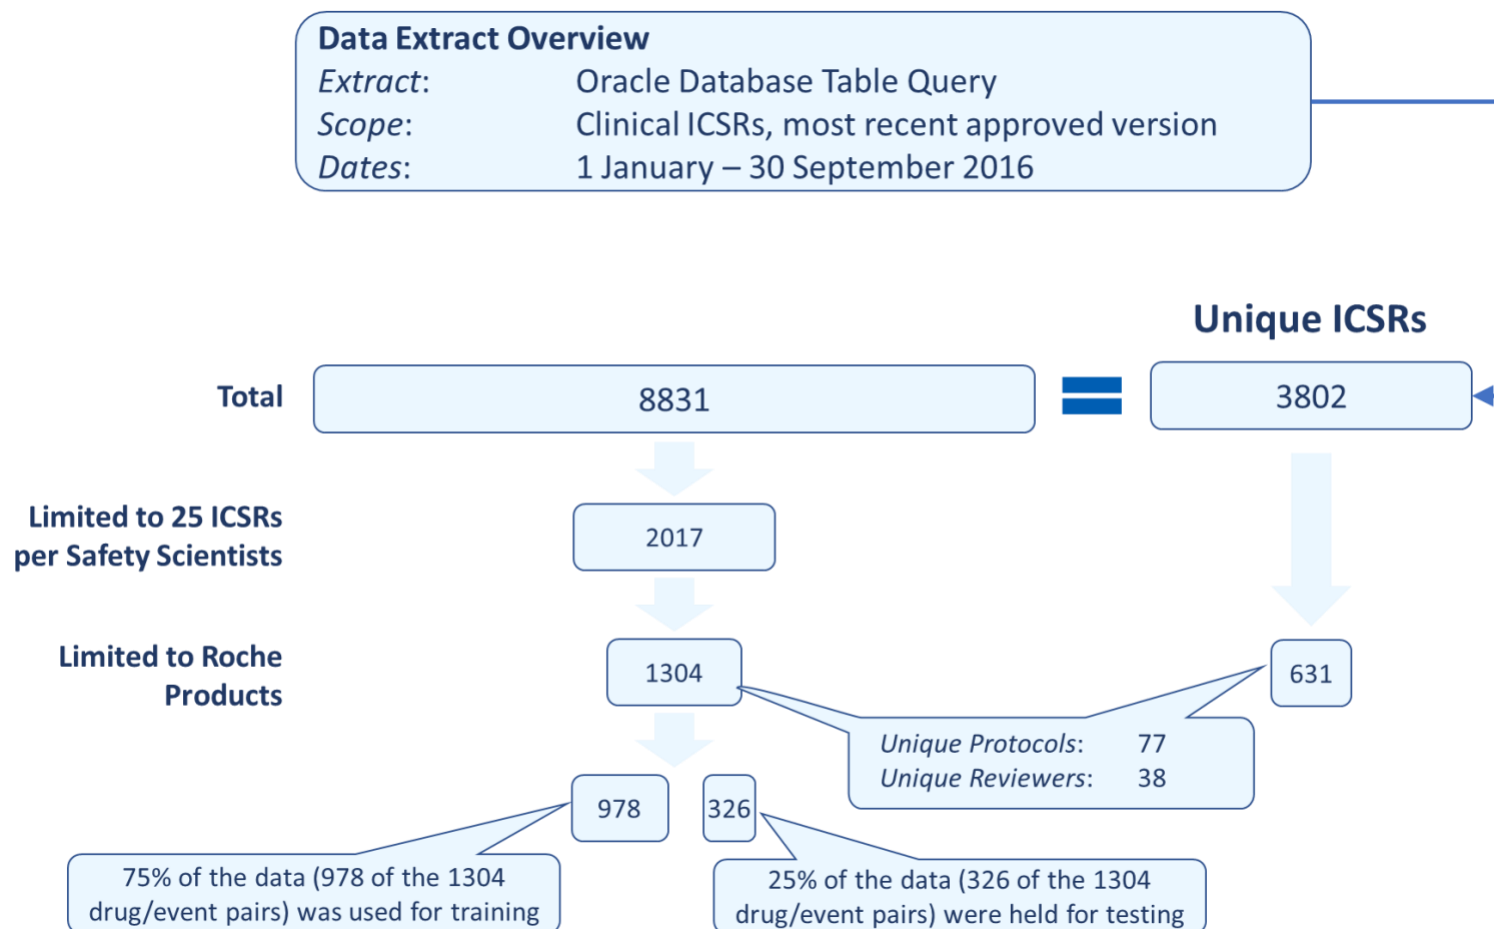

Supplement: 40264_2018_690_MOESM1_ESM.pdf [file 40264_2018_690_MOESM1_ESM.pdf]
