# Supplementary material for: MOdified NARanjo Causality Scale for ICSRs (MONARCSi): A Decision Support Tool for Safety Scientists
Source: PubMed Central journal article supplement — Drug Saf. 2018 Jun 6;41(11):1073–85. doi: 10.1007/s40264-018-0690-y (PMC6182464; doi:10.1007/s40264-018-0690-y), 2018-06-06
Supplement: 40264_2018_690_MOESM5_ESM.pdf [file 40264_2018_690_MOESM5_ESM.pdf]

The MOmodified NARanjo Causality Scale for ICSRs (MONARCSi): A Decision Support Tool for Safety Scientists

Journal: Drug Safety

Authors: Shaun Comfort MD, MBA; Darren Dorrell; Shawman Meireis MBA; Jennifer Fine PhD

Corresponding author: Shaun Comfort MD, MBA

Genentech, Inc – a Member of the Roche Group, South San Francisco, California.

Email: comforts@gene.com

**Online Resource 12** Training Dataset results for the MONARCSi model compared to company causality ratings (N = 512 ICSR drug-event pairs)

|                                                            |        | MONARCSi Causality Determination |     |        |
|------------------------------------------------------------|--------|----------------------------------|-----|--------|
|                                                            |        | Yes                              | No  | Totals |
| Company Causality Determination Using Global Introspection | Yes    | 91                               | 57  | 148    |
|                                                            | No     | 27                               | 337 | 364    |
|                                                            | Totals | 118                              | 394 | 512    |

**Online Resource 13** MONARCSi Training Dataset performance metrics compared with clinical judgment using global introspection as reference (N = 512 ICSR drug-event pairs)

| Performance Metric                                                                                    | Value   |
|-------------------------------------------------------------------------------------------------------|---------|
| Sensitivity<br>% Positive Agreement                                                                   | 61.5%   |
| Specificity<br>% Negative Agreement                                                                   | 92.6%   |
| Positive Predictive Value (Precision)<br>Proportion of true “related” out of all classified “related” | 77.1%   |
| Negative Predictive Value<br>Proportion of true “unrelated” out of all classified “unrelated”         | 85.5%   |
| Gwet AC1 Kappa Score<br>Inter-rater agreement with Ground Truth                                       | 73.3%   |
| F-Score (F1)<br>Harmonic mean between precision and recall                                            | 68.4.0% |

**Online Resource 14** Validation Dataset results for the MONARCSi model compared to company causality ratings (N= 279 ICSR drug-event pairs)

|                                                            |     | MONARCSi Causality Determination |     |        |
|------------------------------------------------------------|-----|----------------------------------|-----|--------|
|                                                            |     | Yes                              | No  | Totals |
| Company Causality Determination Using Global Introspection | Yes | 56                               | 30  | 86     |
|                                                            | No  | 14                               | 179 | 193    |
| Totals                                                     |     | 70                               | 209 | 279    |

**Online Resource 15** MONARCSi Validation Dataset performance metrics compared with clinical judgment using global introspection as reference (N= 279 ICSR drug-event pairs)

| Performance Metric                                                                                    | Value |
|-------------------------------------------------------------------------------------------------------|-------|
| Sensitivity<br>% Positive Agreement                                                                   | 65.1% |
| Specificity<br>% Negative Agreement                                                                   | 92.7% |
| Positive Predictive Value (Precision)<br>Proportion of true “related” out of all classified “related” | 80.0% |
| Negative Predictive Value<br>Proportion of true “unrelated” out of all classified “unrelated”         | 85.6% |
| Gwet AC1 Kappa Score<br>Inter-rater agreement with Ground Truth                                       | 73.6% |
| F-Score (F1)<br>Harmonic mean between precision and recall                                            | 71.8% |
